# Supplementary material
Source: PubMed Central journal article supplement (PMC373422)
Supplement: nar_32_3_e29__1.pdf [file nar_32_3_e29__1.pdf]

## Supplementary Material

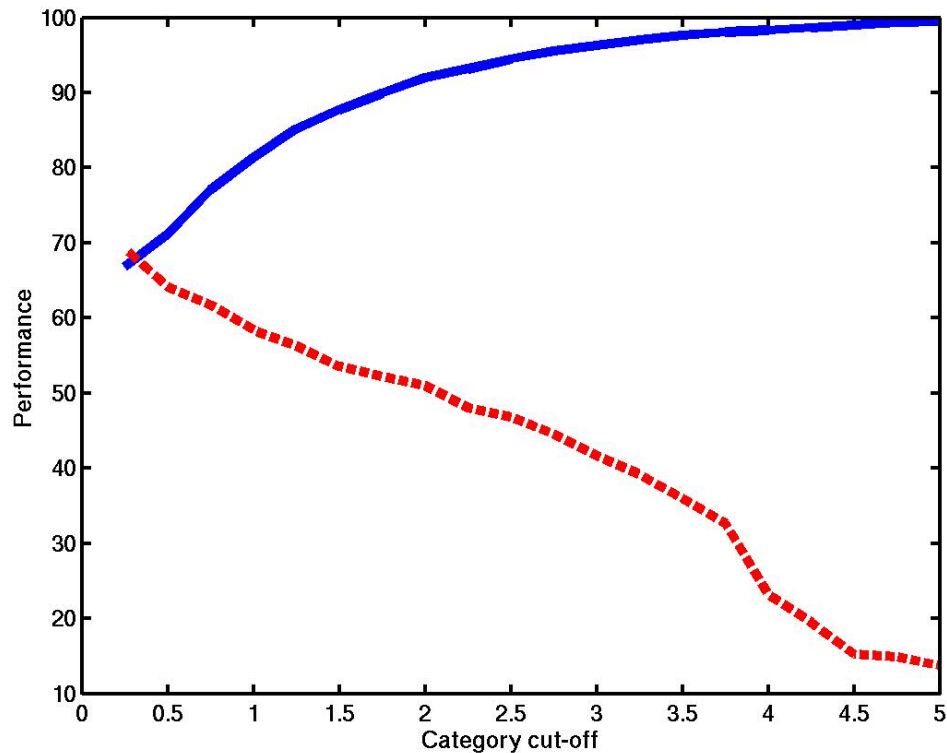

**Supp. Figure 1.** Testing different cut-off values for defining over- and under-expression: In our study, we chose a cut-off value of twice over- or under-expressed (value = 1 on a log<sub>2</sub>-scale) for defining the categories up and down, respectively. When lowering the cut-off value down to 0.25, the percentage of good values went down to 66% (blue solid line). When increasing the cut-off to a value of 2 it reached 90% and converged close to 100% for a cut-off value of 5. The percentage of differentially expressed values qualified as good by our approach went continuously down from 68% at 0.25 to 14% for a cut-off value of 5 (red dashed line).

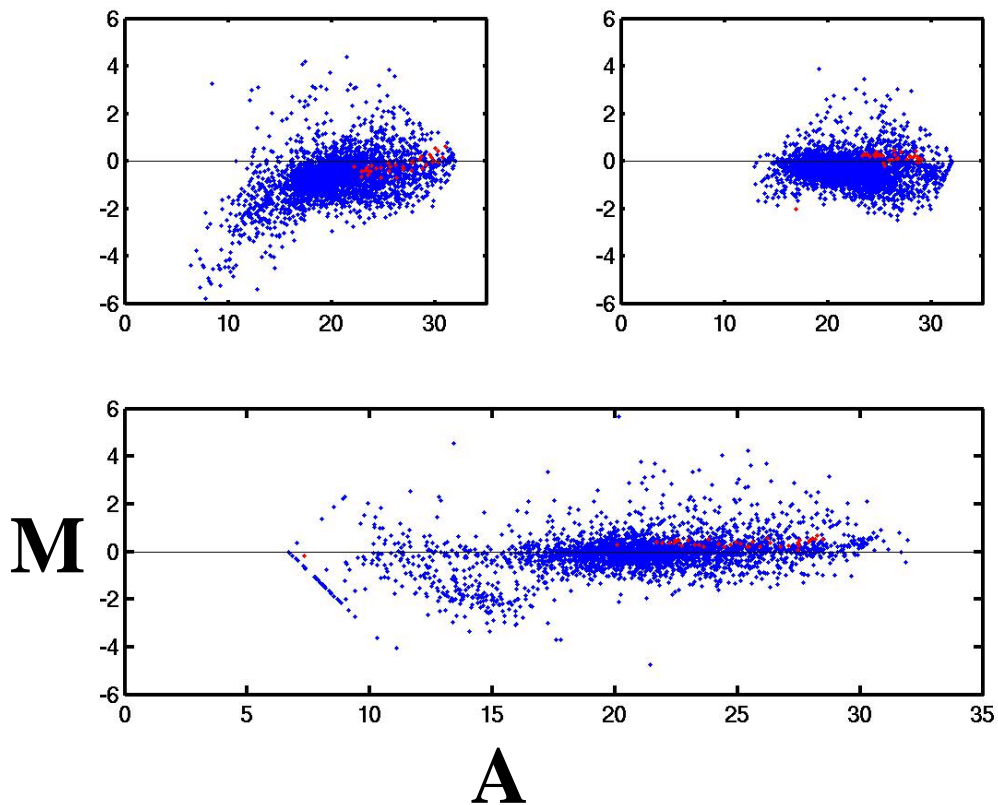

**Supp. Figure 2.** Comparison of raw data vs. normalised data: MA-plots for the representative sample pair (pool, 13) based on raw values of one of the double spots in both hybridisations (upper left and right) and the normalised values (lower), respectively. x-axis: sum of log<sub>2</sub> intensity values of both dyes, y-axis: differences of log<sub>2</sub> intensity values. Dots of the lambda controls are shown in red.

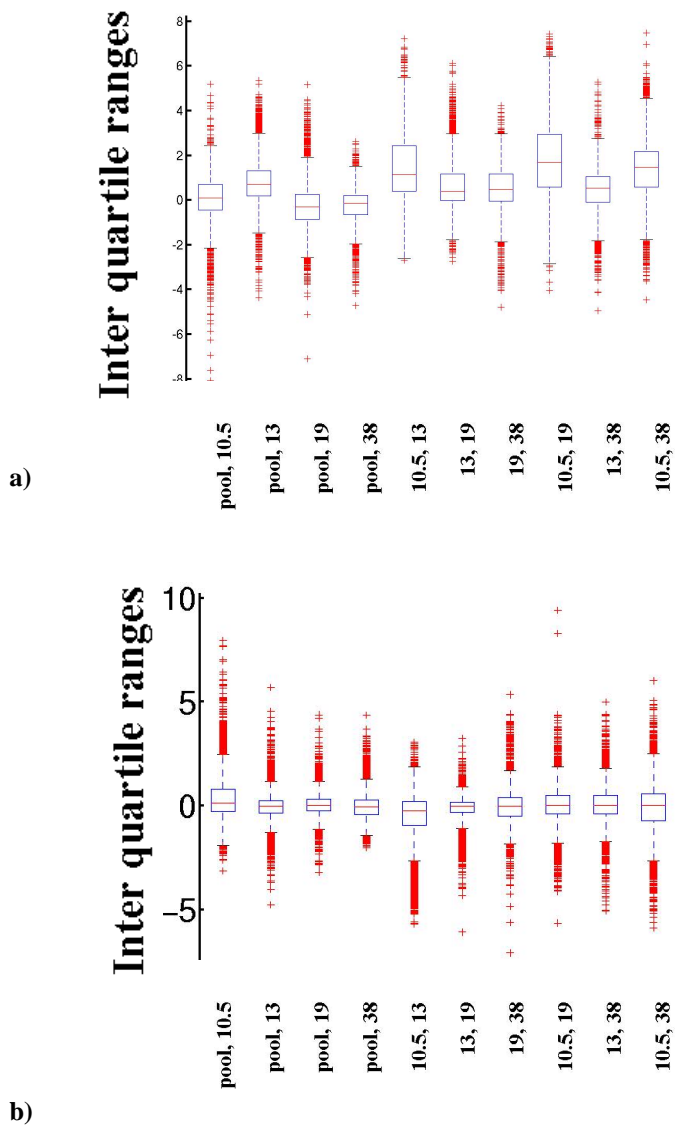

**Supp. Figure 3.** Box-whisker plots for all sample combinations before (a) and after normalisation (b). (a) shows the data from the first hybridisations ("non colour reversed").
